# Supplementary material
Source: publisher figshare collection journal article supplement (https://diabetesjournals.figshare.com/ndownloader/files/22395336)
Supplement: Supplementary file 1 [file 22395336]

## Sheet: Epitope Tables 
Supplementary Table 2 - CD4+ T cell epitopes in type 1 diabetes
Antigen	Position	Sequence	IEDB #1	MHC	Human islets, pLNs		Human blood, spleen		HLA-Tg mouse4	NPP5	Ex vivo type 1	Evidence	Refs7	Corresponding author	Reporting
(Gene)					Ex vivo2	Other3	Ex vivo2	Other3			diabetes > controls6				articles
CHGA (CHGA)	*342-355	WSKMDQLAKELTAE	226405	DQ8			IFNγ ELISpot			Naturally occurring	yes	B+	24239002	Delong T	1
DMK (DMPK)	*9-28	RLQQLVLDPGFLGLEPLLDL	138808	DR0401				Cytokine array; T cell			no	C-	20634998	Kwok WW	1
GAD65	*1-20	MASPGSGFWSFGSEDGSGDS	101054	Class II			3H-thymidine				no	D+	7962558	Atkinson MA	1
(GAD2)	*1-20	MASPGSGFWSFGSEDGSGDS	101054	DR0401				Mmr; T cell			n/a	C-	23228173	Kwok WW	1
	*47-66	LLYGDAEKPAESGGSQPPRA	105302	Class II			3H-thymidine				no	D+	7962558	Atkinson MA	1
	*73-92	CACDQKPCSCSKVDVNYAFL	142554	DR				CD154/CD169 upreg; T cell			n/a	C-	28550202	Kwok WW	1
	*73-92	CACDQKPCSCSKVDVNYAFL	142554	DR0401				Mmr; T cell			n/a	C-	23228173	Kwok WW	1
	*81-100	SCSKVDVNYAFLHATDLLPA	104234	DR				CD154/CD169 upreg; T cell			n/a	C-	28550202	Kwok WW	1
	*86-103	DVNYAFLHATDLLPACDG	186992	DR4				ELISpot			n/a	D+	23710469	De Groot AS	1
	88-99	NYAFLHATDLLP	104163	DR0101				3H-thymidine; T cell		Prot in vitro	n/a	A-	9237801	van Endert PM
	88-99	NYAFLHATDLLP	104163	DR0101				3H-thymidine; T cell			n/a	C-	9645372	van Endert PM
	88-99	NYAFLHATDLLP	104163	DR0101				3H-thymidine; T cell			n/a	C-	11257303	van Endert PM
	*88-99	NYAFLHATDLLP	104163	DR0101				3H-thymidine; T cell		Prot in vitro	n/a	A-	9237801, 9645372, 11257303		3
	*88-99	NYAFLHATDLLP	104163	DRB5				3H-thymidine; T cell			n/a	C-	9645372	van Endert PM	1
	*89-108	YAFLHATDLLPACDGE(R→Cit)PTL	230433	DR0401				Mmr; T cell			n/a	C-	24705406	James EA	1
	*101-115	CDGERPTLAFLQDVM	6101	DQ			3H-thymidine				n/a	D+	10570321	McDevitt HO	1
	*105-124	RPTLAFLQDVMNILLQYVVK	143044	DR0401				Mmr; 3H-thymidine; T cell			n/a	C-	23228173	Kwok WW	1
	*108-129	LAFLQDVMNILLQYVVKSFDRS	105275	Class II			3H-thymidine				no	D+	7962558	Atkinson MA	1
	113-132	DVMNILLQYVVKSFDRSTKV	138762	DR0401				CBA			n/a	D+	20634998	Kwok WW
	113-132	DVMNILLQYVVKSFDRSTKV	138762	DR0401				Mmr; 3H-thymidine; T cell		Prot in vitro	n/a	A-	23228173	Kwok WW
	113-132	DVMNILLQYVVKSFDRSTKV	138762	DR0401			Mmr	T cell			no	C-	30428974	James EA
	*113-132	DVMNILLQYVVKSFDRSTKV	138762	DR0401			Mmr	CBA; Mmr; 3H-thymidine; T cell		Prot in vitro	no	A-	20634998, 23228173, 30428974		3
	*113-132	DVMNILLQYVVKSFDRSTKV	138762	DR				CD154/CD169 upreg; T cell			n/a	C-	28550202	Kwok WW	1
	*113-132	DVMNILLQYVVKSFDRSTKV	138762	DRB4				Mmr			n/a	D+	30455401	Kwok WW	1
	115-127	MNILLQYVVKSFD	100311	DR0401					Pept-imm; hybr	APC	n/a	B	8958223	Wicker LS
	115-127	MNILLQYVVKSFD	100311	DR0401					Pept-imm; hybr	APC	n/a	B	10415074	Reijonen H
	115-127	MNILLQYVVKSFD	100311	DR0401		IFNγ ELISA; T cell					n/a	C+	27798614	Kent SC
	*115-127	MNILLQYVVKSFD	100311	DR0401		IFNγ ELISA; T cell			Pept-imm; hybr	APC	n/a	A+	8958223, 10415074, 27798614		3
	*115-127	MNILLQYVVKSFD	100311	Class II			3H-thymidine				no	D+	20083660	Harrison LC	1
	*115-127	MNILL(Q→E)YVVKSFD	230399	DR0401			Mmr	3H-thymidine; T cell			yes	C-	24705406	James EA	1
	*115-130	MNILLQYVVKSFDRST	104903	DR0401					Prot-imm; hybr	Pr-mouse	n/a	B	9223318	Sonderstrup-McDevitt G	1
	*116-129	NILLQYVVKSFDRS	102675	DRB4				ELISA; 3H-thymidine; T cell			n/a	C-	11414702	Nishimura Y	1
	116-127	NILLQYVVKSFD	104150	DRB4				ELISA; 3H-thymidine; 51Cr; T cell			n/a	C-	9757911	Nishimura Y
	116-127	NILLQYVVKSFD	104150	DRB4				ELISA; 3H-thymidine; T cell			n/a	C-	12517961	Nishimura Y
	*116-127	NILLQYVVKSFD	104150	DRB4				ELISA; 3H-thymidine; 51Cr; T cell			n/a	C-	9757911, 12517961		2
	121-140	YVVKSFDRSTKVIDFHYPNE	102974	DQ8					Prot-imm	Pr-mouse	n/a	B-	10078545	Elliott JF
	121-140	YVVKSFDRSTKVIDFHYPNE	102974	DQ8				3H-thymidine; Mmr; ICS; T cell			n/a	C-	25405480	Kwok WW
	*121-140	YVVKSFDRSTKVIDFHYPNE	102974	DQ8				3H-thymidine; Mmr; ICS; T cell	Prot-imm	Pr-mouse	n/a	A-	10078545, 25405480		2
	*126-140	FDRSTKVIDFHYPNE	103164	DQ			3H-thymidine				no	D+	10570321	McDevitt HO	1
	*146-165	NWELADQPQNLEEILMHCQT	103455	DR1601				3H-thymidine; T cell		Prot in vitro	n/a	A-	9153283	Endl J	1
	*153-172	P(Q→E)NLEEILMHC(Q→E)TTLKYAIK	230405	DR0401				Mmr; T cell			n/a	C-	24705406	James EA	1
	*157-176	EEILMHCQTTLKYAIKTGHP	105161	Class II			3H-thymidine				no	D+	7962558	Atkinson MA	1
	*172-191	KTGHPRYFNQLSTGLDMVGL	105271	Class II			3H-thymidine				no	D+	7962558	Atkinson MA	1
	*173-187	TGHPRYFNQLSTGLD	104649	Class II			3H-thymidine				no	D+	9885897	Altmann DM	1
	*174-185	GHPRYFNQLSTG	103219	DR0401				3H-thymidine; T cell		Prot in vitro	n/a	A-	9153283	Endl J	1
	*175-190	HPRYFNQLSTGLDMVG	187007	DR4				ELISpot			n/a	D+	23710469	De Groot AS	1
	*177-196	RYFNQLSTGLDMVGLAADWL	143056	DR				CD154/CD169 upreg; T cell			n/a	C-	28550202	Kwok WW	1
	*200-217	ANTNMFTYEIAPVFVLLE	103808	DR8 or DR9				ELISA; 3H-thymidine; T cell			n/a	C-	9757911	Nishimura Y	1
	*201-220	NTNMFTYEIAPVFVLLEYVT	102698	DQ8					Prot-imm	Pr-mouse	n/a	B-	10078545	Elliott JF	1
	*201-220	NTNMFTYEIAPVFVLLEYVT	102698	DR0401				Mmr; 3H-thymidine; T cell		Prot in vitro	n/a	A-	23228173	Kwok WW	1
	*202-221	TNMFTYEIAPVFVLLEYVTL	105004	Class II			3H-thymidine				no	D+	7962558	Atkinson MA	1
	*203-226	NMFTYEIAPVFVLLEYVTLKKMRE	187017	DR4				ELISpot			n/a	D+	23710469	De Groot AS	1
	*206-220	TYEIAPVFVLLEYVT	67328	DQ			3H-thymidine				no	D+	10570321	McDevitt HO	1
	*209-228	IAPVFVLLEYVTLKKMREII	142728	DRB4				Mmr			n/a	D+	30455401	Kwok WW	1
	*217-236	EYVTLKKMREIIGWPGGSGD	104481	DR				CD154/CD169 upreg; T cell			n/a	C-	28550202	Kwok WW	1
	*225-244	REIIGWPGGSGDGIFSPGGA	143023	DR				CD154/CD169 upreg; T cell			n/a	C-	28550202	Kwok WW	1
	*231-250	PGGSGDGIFSPGGAISNMYA	102715	DQ8					Prot-imm	Pr-mouse	n/a	B-	10078545	Elliott JF	1
	*232-251	GGSGDGIFSPGGAISNMYAM	105216	Class II			3H-thymidine				no	D+	7962558	Atkinson MA	1
	*243-267	GAISNMYAMMIARFKMFPEVKEKGM	186999	DR4				ELISpot			n/a	D+	23710469	De Groot AS	1
	*247-266	NMYAMMIARFKMFPEVKEKG	45043	DR3				ELISA; 3H-thymidine; T cell			n/a	C-	11295462	Roep BO	1
	247-266	NMYAMMIARFKMFPEVKEKG	45043	Class II			3H-thymidine				yes	D+	7962558	Atkinson MA
	247-266	NMYAMMIARFKMFPEVKEKG	45043	Class II				CFSE; T cell			n/a	C-	27604323	Bonifacio E
	*247-266	NMYAMMIARFKMFPEVKEKG	45043	Class II			3H-thymidine	CFSE; T cell			yes	C-	7962558, 27604323		2
	*247-279	NMYAMMIARFKMFPEVKEKGMAALPRLIAFTSE	101931	Class II			RNA/DNA detection				yes	D+	9840449	Karlsson MGE	1
	248-257	MYAMMIARFK	104140	DRB5				3H-thymidine; T cell		Prot in vitro	n/a	A-	9237801	van Endert PM
	248-257	MYAMMIARFK	104140	DRB5				3H-thymidine; T cell		Prot in vitro	n/a	A-	9645372	van Endert PM
	*248-257	MYAMMIARFK	104140	DRB5				3H-thymidine; T cell		Prot in vitro	n/a	A-	9237801, 9645372		2
	*248-259	MYAMMIARFKMF	104141	DR0101				3H-thymidine; T cell		Prot in vitro	n/a	A-	11257303	van Endert PM	1
	*249-268	YAMMIARFKMFPEVKEKGMA	143224	DR				CD154/CD169 upreg; T cell			n/a	C-	28550202	Kwok WW	1
	*250-266	AMMIARFKMFPEVKEKG	234479	DQ8				Mmr; 3H-thymidine; ICS; T cell			n/a	C-	25405480	Kwok WW	1
	*251-270	MMIARFKMFPEVKEKGMAAL	104118	DR12				3H-thymidine; ELISA; T cell			n/a	C-	11295462	Roep BO	1
	*252-266	MIARFKMFPEVKEKG	104114	DR0404				3H-thymidine; T cell			n/a	C-	10439311	Ou D	1
	*252-266	MIARFKMFPEVKEKG	104114	Class II			3H-thymidine				n/a	D+	10907121	Ou D	1
	*254-276	ARFKMFPEVKEKGMAALPRLIAF	118749	Class II			3H-thymidine				no	D+	11409713	Sarugeri E	1
	260-279	PEVKEKGMAALPRLIAFTSE	105471	Class II			3H-thymidine				yes	D+	7962558	Atkinson MA
	260-279	PEVKEKGMAALPRLIAFTSE	105471	Class II			3H-thymidine				no	D+	11409713	Sarugeri E
	*260-279	PEVKEKGMAALPRLIAFTSE	105471	Class II			3H-thymidine				yes/no	D+	7962558, 11409713		2
	*261-275	EVKEKGMAALPRLIA	186666	Class II			Cytokine array; CFSE	Cytokine array			n/a	D+	23390544	Ueno H	1
	*261-280	EVKEKGMAALPRLIAFTSEH	103893	DQ8				ELISA; 3H-thymidine; T cell			n/a	C-	11295462	Roep BO	1
	*264-287	EKGMAALPRLIAFTSEHSHFSLKK	186995	DR4				ELISpot			n/a	D+	23710469	De Groot AS	1
	*265-284	KGMAALPRLIAFTSEHSHFS	142811	DR0401				Mmr; 3H-thymidine; T cell		Prot in vitro	n/a	A-	23228173	Kwok WW	2
	*265-284	KGMAALP(R→Cit)LIAFTSEHSHFS	230391	DR0401			Mmr	3H-thymidine; T cell			yes	C-	24705406	James EA	2
	*265-284	KGMAALPRLIAFTSEHSHFS	142811	DR				CD154/CD169 upreg; T cell			n/a	C-	28550202	Kwok WW	1
	*266-285	GMAALPRLIAFTSEHSHFSL	104502	DR0401			ELISA				n/a	D+	19505724	Burster T	1
	270-283	LPRLIAFTSEHSHF	103379	DR0401				ELISA; 3H-thymidine; T cell		Prot in vitro	n/a	A-	9153283	Endl J
	270-283	LPRLIAFTSEHSHF	103379	DR0401				3H-thymidine; T cell		Prot in vitro	n/a	A-	14678267	Banga JP
	*270-283	LPRLIAFTSEHSHF	103379	DR0401				ELISA; 3H-thymidine; T cell		Prot in vitro	n/a	A-	9153283, 14678267		2
	*270-284	LPRLIAFTSEHSHFS	103380	DRB4				ELISA; 3H-thymidine; T cell		Prot in vitro	n/a	A-	11905849	Nepom GT	1
	*270-287	LPRLIAFTSEHSHFSLKK	157610	DR0401				Mmr			n/a	D+	22069252	Durinovic-Belló I	1
	*271-285	PRLIAFTSEHSHFSL	104934	DR0401					Prot-imm; hybr	Pr-mouse	n/a	B	9223318	Sonderstrup-McDevitt G	1
	*272-283	RLIAFTSEHSHF	103556	DRB4				ELISA; 3H-thymidine; T cell		Prot in vitro	n/a	A-	11905849	Nepom GT	1
	273-292	LIAFTSEHSHFSLKKGAAAL	138782	DR0401				CBA			n/a	D+	20634998	Kwok WW
	273-292	LIAFTSEHSHFSLKKGAAAL	138782	DR0401				Mmr; T cell		Prot in vitro	n/a	A-	23228173	Kwok WW
	273-292	LIAFTSEHSHFSLKKGAAAL	138782	DR0401			Mmr	T cell			no	C-	30428974	James EA
	*273-292	LIAFTSEHSHFSLKKGAAAL	138782	DR0401			Mmr	CBA, Mmr; T cell		Prot in vitro	no	A-	20634998, 23228173, 30428974		3
	*273-292	LIAFTSEHSHFSLKKGAAAL	138782	DR				CD154/CD169 upreg; T cell			n/a	C-	28550202	Kwok WW	1
	274-286	IAFTSEHSHFSLK	25275	DR0401					Pept-imm; hybr	APC	n/a	B	8958223	Wicker LS
	274-286	IAFTSEHSHFSLK	25275	DR0401					Pept-imm; hybr	APC	n/a	B	10415074	Reijonen H
	274-286	IAFTSEHSHFSLK	25275	DR0401				Mmr			n/a	D+	16263242	Oling V
	274-286	IAFTSEHSHFSLK	25275	DR0401		IFNγ ELISA; T cell					n/a	C+	27798614	Kent SC
	*274-286	IAFTSEHSHFSLK	25275	DR0401		IFNγ ELISA; T cell		Mmr	Pept-imm; hybr	APC	n/a	A+	8958223, 10415074, 16263242, 27798614		4
	*274-286	IAFTSEHSHFSLK	25275	Class II			3H-thymidine				n/a	D+	10907121	Ou D	1
	*276-284	FTSEHSHFS	231904	DR0404				3H-thymidine; T cell			n/a	C-	10439311	Ou D	1
	*289-303	AAALGIGTDSVILIK	130713	Class II			Cytokine array; CFSE	Cytokine array			n/a	D+	23390544	Ueno H	1
	*290-309	AALGIGTDSVILIKCDERGK	104403	Class II			3H-thymidine				no	D+	7962558	Atkinson MA	1
	*297-316	DSVILIKCDERGKMIPSDLE	142591	DR0401				3H-thymidine; T cell			n/a	C-	23228173	Kwok WW	1
	*305-324	DERGKMIPSDLERRILEAKQ	105133	DR0401				Mmr; 3H-thymidine; T cell		Prot in vitro	n/a	A-	23228173	Kwok WW	1
	*320-339	LEAKQKGFVPFLVSATAGTT	105281	Class II			3H-thymidine				no	D+	7962558	Atkinson MA	1
	*321-340	EAKQKGFVPFLVSATAGTTV	103867	DR0401				Mmr; T cell		Prot in vitro	n/a	A-	23228173	Kwok WW	1
	*335-352	TAGTTVYGAFDPLLAVAD	226392	DR3			ELISpot				no	D+	24239002	Delong T	1
	*338-352	TTVYGAFDPLLAVAD	187030	DR4				ELISpot			n/a	D+	23710469	De Groot AS	1
	*353-372	ICKKYKIWMHVDAAWGGGLL	142730	Class II				CD154/CD169 upreg; T cell			n/a	C-	28550202	Kwok WW	1
	*353-372	ICKKYKIWMHVDAAWGGGLL	142730	DRB4				Mmr			n/a	D+	30455401	Kwok WW	1
	*354-372	CKKYKIWMHVDAAWGGGLL	186990	DR4				ELISpot			n/a	D+	23710469	De Groot AS	1
	*356-370	KYKIWMHVDAAWGGG	104868	DR0401					Prot-imm; hybr	Pr-mouse	n/a	B	9223318	Sonderstrup-McDevitt G	1
	*368-388	GGGLLMSRKHKWKLSGVERAN	103921	DPw2				ELISA; 3H-thymidine; T cell			n/a	C-	9757911	Nishimura Y	1
	*369-388	GGLLMSRKHKWKLSGVERAN	142674	DR				CD154/CD169 upreg; T cell			n/a	C-	28550202	Kwok WW	1
	*369-392	GGLLMSRKHKWKLSGVERANSVTW	187001	DR4				ELISpot			n/a	D+	23710469	De Groot AS	1
	*376-390	KHKWKLSGVERANSV	104852	DR0401					Prot-imm; hybr	Pr-mouse	n/a	B	9223318	Sonderstrup-McDevitt G	1
	*377-396	HKWKLSGVERANSVTWNPHK	142717	DR0401				3H-thymidine; T cell			n/a	C-	23228173	Kwok WW	1
	*377-396	HKWKLSGVERANSVTWNPHK	142717	DR				CD154/CD169 upreg; T cell			n/a	C-	28550202	Kwok WW	1
	*385-404	ERANSVTWNPHKMMGVPLQC	105169	Class II			3H-thymidine				no	D+	7962558	Atkinson MA	1
	*405-424	SALLVREEGLMQNCNQMHAS	187026	DR4				ELISpot			n/a	D+	23710469	De Groot AS	1
	*413-431	GLMQNCNQMHASYLFQQDK	103939	DR0101				ELISA; 3H-thymidine; 51Cr ; T cell			n/a	C-	9757911	Nishimura Y	1
	*416-435	QNCNQMHASYLFQQDKHYDL	105488	Class II			3H-thymidine				no	D+	7962558	Atkinson MA	1
	*431-445	KHYDLSYDTGDKALQ	103306	DQ			3H-thymidine				no	D+	10570321	McDevitt HO	1
	*433-452	YDLSYDTGDKALQCGRHVDV	143226	DR0401				Mmr; T cell		Prot in vitro	n/a	A-	23228173	Kwok WW	1
	*433-452	YDLSYDTGDKALQCGRHVDV	143226	Class II				CD154/CD169 upreg; T cell			n/a	C-	28550202	Kwok WW	1
	*446-466	CGRHVDVFKLWLMWRAKGTTG	105120	Class II			3H-thymidine				no	D+	7962558	Atkinson MA	1
	*450-470	VDVFKLWLMWRAKGTTGFEAH	187032	DR4				ELISpot			n/a	D+	23710469	De Groot AS	1
	*461-473	AKGTTGFEAHVDK	103035	DQ			3H-thymidine				no	D+	10570321	McDevitt HO	1
	*462-483	KGTTGFEAHVDKCLELAEYLYN	105261	Class II			3H-thymidine				no	D+	7962558	Atkinson MA	1
	*471-490	VDKCLELAEYLYNIIKNREG	102882	DQ8					Prot-imm	Pr-mouse	n/a	B-	10078545	Elliott JF	1
	*473-492	KCLELAEYLYNIIKNREGYE	142807	DR0401				Mmr; T cell		Prot in vitro	n/a	A-	23228173	Kwok WW	1
	*479-498	EYLYNIIKNREGYEMVFDGK	105173	Class II			3H-thymidine				no	D+	7962558	Atkinson MA	1
	*480-496	YLYNIIKNREGYEMVFD	187035	DR4				ELISpot			n/a	D+	23710469	De Groot AS	1
	*481-495	LYNIIKNREGYEMVF	104898	DR0401					Prot-imm; hybr	Pr-mouse	n/a	B	9223318	Sonderstrup-McDevitt G	1
	*491-510	YEMVFDGKPQHTNVCFWYIP	104352	DR3				ELISA; 3H-thymidine; T cell			n/a	C-	11295462	Roep BO	1
	*491-510	YEMVFDGKPQHTNVCFWYIP	104352	DQ5				ELISA; 3H-thymidine; T cell			n/a	C-	11295462	Roep BO	1
	*493-507	MVFDGKPQHTNVCFW	104575	Class II			3H-thymidine				no	D+	9885897	Altmann DM	1
	*494-513	VFDGKPQHTNVCFWYIPPSL	119539	Class II			3H-thymidine				no	D+	7962558	Atkinson MA	1
	*501-520	HTNVCFWYIPPSLRTLEDNE	103978	DR1				3H-thymidine; T cell			n/a	C-	11295462	Roep BO	1
	*501-520	HTNVCFWYIPPSLRTLEDNE	103978	DR4				3H-thymidine; ELISA; T cell			n/a	C-	11295462	Roep BO	1
	*504-518	VCFWYIPPSLRTLED	187031	DR4				ELISpot			n/a	D+	23710469	De Groot AS	1
	*505-519	CFWYIPPSLRTLEDN	101509	Class II			3H-thymidine	3H-thymidine; T cell			n/a	C-	8816975	Lohmann T	1
	*505-519	CFWYIPPSLRTLEDN	101509	DQ8			3H-thymidine				no	D+	9885897	Altmann DM	1
	*506-518	FWYIPPSLRTLED	103913	Class II			3H-thymidine				no	D+	11409713	Sarugeri E	1
	*509-528	IPPSLRTLEDNEERMSRLSK	102537	Class II			3H-thymidine				no	D+	7962558	Atkinson MA	1
	*511-525	PSLRTLEDNEERMSR	104602	DR0401					Prot-imm; hybr	Pr-mouse	n/a	B	9223318	Sonderstrup-McDevitt G	1
	*511-525	PSLRTLEDNEERMSR	104602	DR4				ELISpot			n/a	D+	23710469	De Groot AS	1
	*511-530	PSLRTLEDNEERMSRLSKVA	104189	DR3				ELISA; 3H-thymidine; T cell			n/a	C-	11295462	Roep BO	1
	*521-535	ERMSRLSKVAPVIKA	101609	Class II			3H-thymidine	3H-thymidine; T cell			n/a	C-	8816975	Lohmann T	1
	*521-535	ERMSRLSKVAPVIKA	101609	DQ8			3H-thymidine				yes	D+	9885897	Altmann DM	1
	524-543	SRLSKVAPVIKARMMEYGTT	102085	Class II			3H-thymidine				no	D+	7962558	Atkinson MA
	524-543	SRLSKVAPVIKARMMEYGTT	102085	Class II			3H-thymidine				yes	D+	10586096	Dosch HM
	*524-543	SRLSKVAPVIKARMMEYGTT	102085	Class II			3H-thymidine				yes/no	D+	7962558, 10586096		2
	*529-548	VAPVIKARMMEYGTTMVSYQ	143155	DRB4				Mmr			n/a	D+	30455401	Kwok WW	1
	*533-547	IKARMMEYGTTMVSY	104522	Class II			3H-thymidine				no	D+	9885897	Altmann DM	1
	*536-550	RMMEYGTTMVSYQPL	103560	DQ			3H-thymidine				no	D+	10570321	McDevitt HO	1
	*536-550	RMMEYGTTMVSYQPL	103560	DQ8					PolyIC-treat		n/a	D-	29967002	Boitard C	1
	*539-558	EYGTTMVSYQPLGDKVNFFR	105172	Class II			3H-thymidine				no	D+	7962558	Atkinson MA	1
	*545-564	VSYQPLGDKVNFFRMVISNP	143204	DR0401				Mmr; 3H-thymidine; T cell		Prot in vitro	n/a	A-	23228173	Kwok WW	1
	*545-585	VSYQPLGDKVNFFRMVISNPAATHQDIDFLIEEIERLGQDL	102216	Class II			3H-thymidine				yes	D+	7911924	Leslie RDG	1
	*546-560	SYQPLGDKVNFFRMV	104994	DR0401					Prot-imm; hybr	Pr-mouse	n/a	B	9223318	Sonderstrup-McDevitt G	1
	*550-570	LGDKVNFFRMVISNPAATHQD	187013	DR4				ELISpot			n/a	D+	23710469	De Groot AS	1
	*551-565	GDKVNFFRMVISNPA	104792	DR0401					Prot-imm; hybr	Pr-mouse	n/a	B	9223318	Sonderstrup-McDevitt G	1
	*552-572	DKVNFFRMVISNPAATHQDID	119442	DR0401				Mmr; T cell			n/a	C-	12021103	Rowley MJ	1
	*553-570	KVNFFRMVISNPAATHQD	102589	DR4				ELISA; 3H-thymidine; T cell		MS	n/a	A-	11172025	Nepom GT	1
	553-572	KVNFFRMVISNPAATHQDID	138779	DR0401				CBA			n/a	D+	20634998	Kwok WW
	553-572	KVNFFRMVISNPAATHQDID	138779	DR0401				Mmr; 3H-thymidine; T cell		Prot in vitro	n/a	A-	23228173	Kwok WW
	*553-572	KVNFFRMVISNPAATHQDID	138779	DR0401				CBA; Mmr; 3H-thymidine; T cell		Prot in vitro	n/a	A-	20634998, 23228173		2
	*553-572	KVNFFRMVISNPAATHQDID	138779	Class II				CD154/CD169 upreg; T cell			n/a	C-	28550202	Kwok WW	1
	*553-572	KVNFFRMVISNPAATHQDID	138779	DRB4				Mmr			n/a	D+	30455401	Kwok WW	1
	*553-572	KVNFF(R→Cit)MVISNPAATHQDID	230397	DR0401				Mmr; T cell			n/a	C-	24705406	James EA	3
	*554-573	VNFFRMVISNPAATHQDIDF	119541	Class II			3H-thymidine				no	D+	7962558	Atkinson MA	1
	*554-567	VNFFRMVISNPAAT	158453	DR0401				Mmr			n/a	D+	22069252	Durinovic-Belló I	1
	*554-575	VNFFRMVISNPAATHQDIDFLI	226402	DR4			ELISpot				no	D+	24239002	Delong T	1
	555-567	NFFRMVISNPAAT	101067	DR0401				Mmr; T cell			n/a	C-	12021103	Rowley MJ
	555-567	NFFRMVISNPAAT	101067	DR0401				3H-thymidine; T cell			n/a	C-	14679042	Reijonen H
	555-567	NFFRMVISNPAAT	101067	DR0401				Mmr; cytokine array; 3H-thymidine; T cell			n/a	C-	15277377	Reijonen H
	555-567	NFFRMVISNPAAT	101067	DR0401				Mmr; ELISpot			n/a	D+	19482555	Standifer NE
	555-567	NFFRMVISNPAAT	101067	DR0401		IFNγ ELISA; CBA; T cell					n/a	C+	27798614	Kent SC
	*555-567	NFFRMVISNPAAT	101067	DR0401		IFNγ ELISA; CBA; T cell		Mmr; cytokine array; 3H-thymidine; ELISpot; T cell			n/a	C+	12021103, 14679042, 15277377, 19482555, 27798614		5
	555-567	NFFRMVISNPAAT	101067	DR0404				Mmr; 3H-thymidine; T cell			n/a	C-	15277377	Reijonen H
	555-567	NFFRMVISNPAAT	101067	DR0404				Cytokine array; 3H-thymidine; T cell			n/a	C-	15549775	Gebe JA
	*555-567	NFFRMVISNPAAT	101067	DR0404				Cytokine array; Mmr; 3H-thymidine; T cell			n/a	C-	15277377, 15549775		2
	*555-567	NFFRMVISNPAAT	101067	DR4			CFSE	Mmr			no	D+	16249070	Kwok WW	1
	*556-570	FFRMVISNPAATHQD	104775	DR0401					Prot-imm; hybr	Pr-mouse	n/a	B	9223318	Sonderstrup-McDevitt G	1
	556-575	FFRMVISNPAATHQDIDFLI	103167	DR0401				ELISA; 3H-thymidine; T cell		Prot in vitro	n/a	A-	9153283	Endl J
	556-575	FFRMVISNPAATHQDIDFLI	103167	DR0401				3H-thymidine; T cell		Prot in vitro	n/a	A-	14678267	Banga JP
	*556-575	FFRMVISNPAATHQDIDFLI	103167	DR0401				ELISA; 3H-thymidine; T cell		Prot in vitro	n/a	A-	9153283, 14678267		2
	*563-575	NPAATHQDIDFLI	102684	DRB4				3H-thymidine; T cell		Prot in vitro	n/a	A-	11206414	Schendel DJ	1
	*565-580	AATHQDIDFLIEEIER	104721	DR0401					Prot-imm; hybr	Pr-mouse	n/a	B	9223318	Sonderstrup-McDevitt G	1
	*566-585	ATHQDIDFLIEEIERLGQDL	103818	Class II			3H-thymidine				no	D+	7962558	Atkinson MA	1
	*566-585	ATHQDIDFLIEEIERLGQDL	103818	DRB4				Mmr			n/a	D+	30455401	Kwok WW	1
GRP78	*195-209	VMRIINEPTAAAIAY	546164	DR0401			Mmr				no	D+	30348823	Overbergh L	1
(HSPA5)	*195-209	VM(R→Cit)IINEPTAAAIAY	858100	DR0401			Mmr	Mmr			no	D+	30348823	Overbergh L	1
	*292-305	VEKAK(R→Cit)ALSSQHQA	590605	Class II		IFNγ ELISA; T cell					n/a	C+	27798614	Kent SC	1
	*498-512	EVTFEIDVNGILRVT	857879	DR0401			Mmr				no	D+	30348823	Overbergh L	1
	*498-512	EVTFEIDVNGIL(R→Cit)VT	857878	DR0401			Mmr	Mmr; T cell			yes	C-	30348823	Overbergh L	1
	*500-514	TFEIDVNGIL(R→Cit)VTAE	858056	DR0401				Mmr			n/a	D+	30348823	Overbergh L	1
HSP60	*31-50	KFGADARALMLQGVDLLADA	79582	Class II			3H-thymidine				n/a	D+	10047432	Cohen IR	1
(HSPD1)	*136-155	NPVEIRRGVMLAVDAVIAEL	102687	Class II			3H-thymidine				n/a	D+	10047432	Cohen IR	1
	*242-256	AYVLLSEKKISSIQS	114753	DR			Prolif; ELISA ; CBA				n/a	D+	22492505	Verrijn Stuart AA	1
	*255-275	QSIVPALEIANAHRKPLVIIA	102750	Class II			3H-thymidine				n/a	D+	10047432	Cohen IR	1
	*280-294	GEALSTLVLNRLKVG	114829	DR			Prolif; ELISA ; CBA				n/a	D+	22492505	Verrijn Stuart AA	1
	*286-305	LVLNRLKVGLQVVAVKAPGF	40453	Class II			3H-thymidine				n/a	D+	10047432	Cohen IR	1
	*394-408	LAKLSDGVAVLKVGG	104547	Class II				IL-13 Elispot			no	D+	16283109	Szebeni A	1
	*436-455	IVLGGGCALLRCIPALDSLT	79579	Class II			3H-thymidine				n/a	D+	10047432	Cohen IR	1
	*466-485	EIIKRTLKIPAMTIAKNAGV	79540	Class II			3H-thymidine				n/a	D+	10047432	Cohen IR	1
	*511-530	VNMVEKGIIDPTKVVRTALL	102911	Class II			3H-thymidine				n/a	D+	10047432	Cohen IR	1
HSP70	*1-20	MAKAAA(I→V)GIDLGTTYSCVGV	102642	Class II			3H-thymidine				n/a	D+	12791317	Abulafia-Lapid R	1
(HSPA1B)	*166-185	GLNVLRIINEPTAAAIAYGL	102794	Class II			3H-thymidine				n/a	D+	12791317	Abulafia-Lapid R	1
	*211-230	TIDDGIFEVKATAGDTHLGG	102846	Class II			3H-thymidine				n/a	D+	12791317	Abulafia-Lapid R	1
	*226-245	THLGGEDFDNRLVNHFVEEF	102842	Class II			3H-thymidine				n/a	D+	12791317	Abulafia-Lapid R	1
	*271-290	KRTLSSSTQASLEIDSLFEG	102579	Class II			3H-thymidine				n/a	D+	12791317	Abulafia-Lapid R	1
	*391-410	LLLLDVAPLSLGLETAGGVM	102619	Class II			3H-thymidine				n/a	D+	12791317	Abulafia-Lapid R	1
	*421-440	PTKQTQIFTTYSDNQPGVLI	102728	Class II			3H-thymidine				n/a	D+	12791317	Abulafia-Lapid R	1
	*497-516	KANKITITNDKGRLSKEEIE	102548	Class II			3H-thymidine				n/a	D+	12791317	Abulafia-Lapid R	1
	*512-531	KEEIERMVQEAEKYKAEDEV	102553	Class II			3H-thymidine				n/a	D+	12791317	Abulafia-Lapid R	1
IA-2	*142-159	LQDIPTGSAPAAQHRLPQ	536828	DQ8 or DQ8trans			IL-10 ELISpot			MS	n/a	B+	26718497	Roep BO	1
(PTPRN)	*197-209	PSLSYEPALLQPY	104603	Class II			3H-thymidine				no	D+	10867713	Leslie RDG	1
	*198-216	SLSYEPALL(Q→E)PYLFH(Q→E)FGS	914422	DQ8		IFNγ ELISA	Mmr	Mmr; T cell			n/a	C+	29654212	James EA	1
	*264-284	LPGPSPAQLFQDSGLLYLAQE	534743	DR4			IFNγ release			MS	n/a	B+	26944932	Roep BO	1
	*293-311	VPRLPEQGSSSRAEDSPEG	538314	DQ			ELISpot			MS	n/a	B+	26718497	Roep BO	1
	*318-333	GDRGEKPASPAVQPDA	535895	DQ			ELISpot			MS	n/a	B+	26718497	Roep BO	1
	*319-342	DRGEKPASPAVQPDAALQRLAAVL	534686	DR3			IFNγ release			MS	n/a	B+	26944932	Roep BO	1
	*449-488	SPLGQSQPTVAGQPSARPAAEEYGYIVTDQKPLSLAAGVK	534789	DR3			IFNγ release			MS	n/a	B+	26944932	Roep BO	1
	*467-482	AAEEYGYIVTD(Q→E)KPLS	914337	DQ8			Mmr	Mmr; T cell			n/a	C-	29654212	James EA	1
	*490-502	LEILAEHVHMSSG	104552	Class II			3H-thymidine				no	D+	10867713	Leslie RDG	1
	*502-514	GSFINISVVGPAL	104510	Class II			3H-thymidine				no	D+	10867713	Leslie RDG	1
	*523-536	QNLSLADVT(Q→E)(Q→E)AGL	914404	DQ8			Mmr	Mmr; T cell			n/a	C-	29654212	James EA	1
	*545-562	TGL(Q→E)IL(Q→E)TGVG(Q→E)REEAAA	914426	Class II		IFNγ ELISA; T cell					n/a	C+	27798614	Kent SC	1
	*545-562	TGL(Q→E)IL(Q→E)TGVG(Q→E)REEAAA	914426	DQ8		CD25 upreg	Mmr	Mmr; T cell			n/a	C+	29654212	James EA	1
	*575-587	RSVLLTLVALAGV	104618	Class II			3H-thymidine				no	D+	10867713	Leslie RDG	1
	*601-618	RQHARQQDKERLAALGPE	104966	DQ8					Pept-imm		n/a	D-	11600216	David CS	1
	*608-620	DKERLAALGPEGA	910445	Class II			3H-thymidine				n/a	D+	10376440	Lohmann T	1
	*616-633	GPEGAHGDTTFEYQDLCR	104813	DQ8					Pept-imm		n/a	D-	11600216	David CS	1
	*646-663	EGPPEPSRVSSVSSQFSD	104764	DQ8					Pept-imm		n/a	D-	11600216	David CS	1
	*654-674	VSSVSSQFSDAAQASPSSHSS	933295	DR4			3H-thymidine			MS	n/a	B+	10562307	Peakman M	1
	*657-674	VSSQFSDAAQASPSSHSS	104677	DR0401			3H-thymidine				n/a	D+	10562307	Peakman M	1
	*661-678	FSDAAQASPSSHSSTPSW	104781	DQ8					Pept-imm		n/a	D-	11600216	David CS	1
	*685-700	ANMDISTGHMILAYME	105676	DR4			3H-thymidine				n/a	D+	9606176	Honeyman MC, Harrison LC	1
	*709-731	LAKEWQALCAYQAEPNTCATAQG	104546	DR0401			3H-thymidine			MS	n/a	B+	10562307	Peakman M	1
	*709-733	LAKEWQALCAYQAEPNTCATAQGEG	874656	DR0401			Mmr				no	D+	30428974	James EA	1
	709-736	LAKEWQALCAYQAEPNTCATAQGEGNIK	134126	Class II			ELISpot				n/a	D+	20369219	Dayan CM
	709-736	LAKEWQALCAYQAEPNTCATAQGEGNIK	134126	Class II			ELISpot				n/a	D+	25225671	Christie MR
	*709-736	LAKEWQALCAYQAEPNTCATAQGEGNIK	134126	Class II			ELISpot				n/a	D+	20369219, 25225671		2
	*713-728	WQALCAYQAEPNTCAT	106189	DR4			3H-thymidine				n/a	D+	9606176	Honeyman MC, Harrison LC	1
	*717-729	CAYQAEPNTCATA	104437	Class II			3H-thymidine				no	D+	10867713	Leslie RDG	1
	*721-738	AEPNTCATAQGEGNIKKN	104723	DQ8					Pept-imm		n/a	D-	11600216	David CS	1
	*745-760	PYDHARIKLKVESSPS	106021	DR4			3H-thymidine				n/a	D+	9606176	Honeyman MC, Harrison LC	1
	*751-770	IKLKVESSPSRSDYINASPI	104523	DR0401				3H-thymidine; T cell			n/a	C-	10868956	Christie MR	1
	752-775	KLKVESSPSRSDYINASPIIEHDP	134118	Class II			ELISpot				n/a	D+	20369219	Dayan CM
	752-775	KLKVESSPSRSDYINASPIIEHDP	134118	Class II			ELISpot				n/a	D+	25225671	Christie MR
	*752-775	KLKVESSPSRSDYINASPIIEHDP	134118	Class II			ELISpot				n/a	D+	20369219, 25225671		2
	*752-775	KLKVESSPSRSDYINASPIIEHDP	134118	DR4			ELISpot			MS	n/a	B+	14755342	Peakman M	1
	*766-783	NASPIIEHDPRMPAYIAT	104909	DQ8					Pept-imm		n/a	D-	11600216	David CS	1
	*778-790	PAYIATQGPLSHT	104590	Class II			3H-thymidine				no	D+	10867713	Leslie RDG	1
	*787-802	LSHTIADFWQMVWESG	105943	DR4			3H-thymidine				n/a	D+	9606176	Honeyman MC, Harrison LC	1
	*793-808	DFWQMVWESGCTVIVM	105709	DR4			3H-thymidine				n/a	D+	9606176	Honeyman MC, Harrison LC	1
	*793-817	DFWQMVWESGCTVIVMLTPLVEDGV	233467	Class II			ELISpot				n/a	D+	25225671	Christie MR	1
	*797-809	MVWESGCTVIVML	910496	Class II			3H-thymidine				n/a	D+	10376440	Lohmann T	1
	*797-817	MVWESGCTVIVMLTPLVEDGV	104578	DR0401			3H-thymidine				n/a	D+	10562307	Peakman M	1
	*799-814	WESGCTVIVMLTPLVE	106184	DR3-DQ2			3H-thymidine				n/a	D+	9606176	Honeyman MC, Harrison LC	1
	*799-814	WESGCTVIVMLTPLVE	106184	DR4			3H-thymidine				n/a	D+	9606176	Honeyman MC, Harrison LC	1
	*803-815	CTVIVMLTPLVED	104441	Class II			3H-thymidine				no	D+	10867713	Leslie RDG	1
	*804-816	TVIVMLTPLVEDG	910528	Class II			3H-thymidine				n/a	D+	10376440	Lohmann T	1
	*805-817	VIVMLTPLVEDGV	133730	Class II			3H-thymidine	3H-thymidine; ICS; T cell			no	C-	20083660	Harrison LC	1
	*805-820	VIVMLTPLVEDGVKQC	106162	DR3-DQ2			3H-thymidine				n/a	D+	9606176	Honeyman MC, Harrison LC	1
	*805-820	VIVMLTPLVEDGVKQC	106162	DR4			3H-thymidine				n/a	D+	9606176	Honeyman MC, Harrison LC	1
	*826-843	DEGASLYHVYEVNLVSEH	922741	DQ8					Pept-imm		n/a	D-	11600216	David CS	1
	*830-842	SLYHVYEVNLVSE	104629	Class II			3H-thymidine				no	D+	10867713	Leslie RDG	1
	*831-850	LYHVYEVNLVSEHIWCEDFL	104566	DP0401				3H-thymidine; T cell			n/a	C-	10868956	Christie MR	1
	*841-856	SEHIWCEDFLVRSFYL	106100	DR3-DQ2			3H-thymidine				n/a	D+	9606176	Honeyman MC, Harrison LC	1
	*841-856	SEHIWCEDFLVRSFYL	106100	DR4			3H-thymidine				n/a	D+	9606176	Honeyman MC, Harrison LC	1
	*841-860	SEHIWCEDFLVRSFYLKNVQ	104620	DP0401				3H-thymidine; T cell			n/a	C-	10868956	Christie MR	1
	*841-860	SEHIWCEDFLVRSFYLKNVQ	104620	DR4			ELISpot				n/a	D+	25225671	Christie MR	2
	*845-860	WCEDFLVRSFYLKNVQ	106182	DR4			3H-thymidine				n/a	D+	9606176	Honeyman MC, Harrison LC	2
	*847-862	EDFLVRSFYLKNVQTQ	105741	DR3-DQ2			3H-thymidine				n/a	D+	9606176	Honeyman MC, Harrison LC	1
	*847-862	EDFLVRSFYLKNVQTQ	105741	DR4			3H-thymidine				n/a	D+	9606176	Honeyman MC, Harrison LC	1
	*853-872	SFYLKNVQTQETRTLTQFHF	134229	DR4			ELISpot				n/a	D+	25225671	Christie MR	1
	*854-866	FYLKNVQTQETRT	910467	Class II			3H-thymidine				n/a	D+	10376440	Lohmann T	1
	*854-872	FYLKNVQTQETRTLTQFHF	104493	DR0401			3H-thymidine				n/a	D+	10562307	Peakman M	1
	*889-904	DFRRKVNKCYRGRSCP	105708	DR4-DQ8			3H-thymidine				n/a	D+	9606176	Honeyman MC, Harrison LC	1
	*918-930	TYILIDMVLNRMA	104662	Class II			3H-thymidine				no	D+	10867713	Leslie RDG	1
	*919-934	YILIDMVLNRMAKGVK	106198	DR3-DQ2			3H-thymidine				n/a	D+	9606176	Honeyman MC, Harrison LC	1
	*919-934	YILIDMVLNRMAKGVK	106198	DR4			3H-thymidine				n/a	D+	9606176	Honeyman MC, Harrison LC	1
	*931-948	KGVKEIDIAATLEHVRDQ	922742	DQ8					Pept-imm		n/a	D-	11600216	David CS	1
	*933-945	VKEIDIAATLEHV	910531	Class II			3H-thymidine				n/a	D+	10376440	Lohmann T	1
	*955-975	SKDQFEFALTAVAEEVNAILK	104626	DR0401			3H-thymidine				n/a	D+	10562307	Peakman M	1
	*957-969	DQFEFALTAVAEE	104447	Class II			3H-thymidine				no	D+	10867713	Leslie RDG	1
	*959-974	FEFALTAVAEEVNAIL	105774	DR4			3H-thymidine				n/a	D+	9606176	Honeyman MC, Harrison LC	1
	*961-979	FALTAVAEEVNAILKALPQ	104772	DQ8					Pept-imm		n/a	D-	11600216	David CS	1
IAPP	*65-84	VGSNTYGK(R→Cit)NAVEVLK(R→Cit)EPL	590688	Class II		IFNγ ELISA; T cell					n/a	C+	27798614	Kent SC	1
(IAPP)	*65-84	VGSNTYGK(R→Cit)NAVEVLK(R→Cit)EPL	590688	DQ8			Mmr	Mmr; T cell			n/a	C-	29654212	James EA	1
ICA69 (ICA1)	*36-47	AFIKATGKKEDE	104413	Class II			Prolif				yes	D+	10586096	Dosch HM	1
IGRP	*13-25	QHLQKDYRAYYTF	106039	DR0301				Mmr; T cell			n/a	C-	16493034	Kwok WW	1
(G6PC2)	*17-36	KDYRAYYTFLNFMSNVGDPR	138777	DR0401				cytokine array			n/a	D+	20634998	Kwok WW	1
	*23-35	YTFLNFMSNVGDP	106206	DR0401				Mmr; T cell			n/a	C-	16493034	Kwok WW	2
	*177-196	HQVILGVIGGMLVAEAFEHT	644404	Class II				CD69/CD154 upreg; T cell			n/a	C-	28550202	Kwok WW	1
	*226-238	RVLNIDLLWSVPI	106096	DR0301				Mmr; T cell			n/a	C-	16493034	Kwok WW	1
	241-260	KWCANPDWIHIDTTPFAGLV	138780	DR0401				cytokine array			n/a	D+	20634998	Kwok WW
	241-260	KWCANPDWIHIDTTPFAGLV	138780	DR0401			Mmr				no	D+	30428974	James EA
	*241-260	KWCANPDWIHIDTTPFAGLV	138780	DR0401			Mmr	cytokine array			no	D+	20634998, 30428974		2
	*241-260	KWCANPDWIHIDTTPFAGLV	138780	Class II				CD69/CD154 upreg; T cell			n/a	C-	28550202	Kwok WW	1
	247-259	DWIHIDTTPFAGL	105736	DR0401				Mmr; ICS; T cell			n/a	C-	16493034	Kwok WW
	247-259	DWIHIDTTPFAGL	105736	DR0401				Mmr; T cell			n/a	C-	19180473	Buckner JH
	247-259	DWIHIDTTPFAGL	105736	DR0401				Mmr; T cell			n/a	C-	24478396	Bothwell AL
	*247-259	DWIHIDTTPFAGL	105736	DR0401				Mmr; ICS; T cell			n/a	C-	16493034, 19180473, 24478396		3
	*305-324	QLYHFLQIPTHEEHLFYVLS	648592	DR				CD69/CD154 upreg; T cell			n/a	C-	28550202	Kwok WW	1
INS	*1-15 (L1-15)	MALWMRLLPLLALLA	840899	DQ8					Prot-imm; polyIC-treat; spont	Pr-mouse	n/a	B-	29967002	Boitard C	1
(INS)	*1-16 (L1-16)	MALWMRLLPLLALLAL	103406	Class II				3H-thymidine; ELISA			n/a	D+	14745491	Durinovic-Belló I	1
	*1-24 (L1-24)	MALWMRLLPLLALLALWGPDPAAA	105962	DQ8					Pept-imm		n/a	D-	9438206	David CS	1
	*1-24 (L1-24)	MALWMRLLPLLALLALWGPDPAAA	105962	DQ6					Pept-imm		n/a	D-	9438206	David CS	1
	*5-20 (L5-20)	MRLLPLLALLALWGPD	923548	Class II				3H-thymidine; ELISA			n/a	D+	14745491	Durinovic-Belló I	1
	*8-23 (L8-23)	LPLLALLALWGPDPAA	840893	DQ8					Prot-imm; polyIC-treat	Pr-mouse	n/a	B-	29967002	Boitard C	1
	*9-24 (L9-24)	PLLALLALWGPDPAAA	923645	Class II				3H-thymidine; ELISA			n/a	D+	14745491	Durinovic-Belló I	1
	*9-28 (L9-B4)	PLLALLALWGPDPAAAFVNQ	142953	DRB4			Mmr	Mmr; T cell			n/a	D+	30455401	Kwok WW	1
	*11-26 (L11-B2)	LALLALWGPDPAAAFV	104548	DR0401					Prot-imm	Pr-mouse	n/a	B-	9520453	Sønderstrup G	1
	*13-28 (L13-B4)	LLALWGPDPAAAFVNQ	923488	Class II				3H-thymidine; ELISA			n/a	D+	14745491	Durinovic-Belló I	1
	*14-33 (L14-B9)	LALWGPDPAAAFVNQHLCGS	105917	DQ8					Prot-imm		n/a	D-	9438206	David CS	1
	*14-33 (L14-B9)	LALWGPDPAAAFVNQHLCGS	105917	DQ6					Prot-imm		n/a	D-	9438206	David CS	1
	*16-30 (L16-B6)	LWGPDPAAAFVNQHL	933452	DQ8					Prot-imm; polyIC-treat; spont	Pr-mouse	n/a	B-	29967002	Boitard C	1
	*17-24 (L17-24)	WGPDPAAA	103728	DQ8 transdimer				ELISpot		eluted peptide	n/a	B+	26718497	Roep BO	1
	*17-32 (L17-B8)	WGPDPAAAFVNQHLCG	923967	Class II				3H-thymidine; ELISA			n/a	D+	14745491	Durinovic-Belló I	1
	*18-30 (L18-B6)	GPDPAAAFVNQHL	933381	DQ8					Prot-imm; polyIC-treat; spont	Pr-mouse	n/a	B-	29967002	Boitard C	1
	*20-35 (L20-B11)	DPAAAFVNQHLCGSHL	840818	DQ8					Prot-imm; polyIC-treat; spont	Pr-mouse	n/a	B-	29967002	Boitard C	1
	*21-36 (L21-B12)	PAAAFVNQHLCGSHLV	104589	DR0401					Prot-imm	Pr-mouse	n/a	B-	9520453	Sønderstrup G	1
	*21-36 (L21-B12)	PAAAFVNQHLCGSHLV	104589	Class II				3H-thymidine; ELISA			n/a	D+	14745491	Durinovic-Belló I	1
	25-40 (B1-16)	FVNQHLCGSHLVEALY	840840	Class II			3H-thymidine				n/a	D+	12592644	Dayan CM
	25-40 (B1-16)	FVNQHLCGSHLVEALY	840840	Class II				3H-thymidine; ELISA			n/a	D+	14745491	Durinovic-Belló I
	*25-40 (B1-16)	FVNQHLCGSHLVEALY	840840	Class II			3H-thymidine	3H-thymidine; ELISA			n/a	D+	12592644, 14745491		2
	*25-40 (B1-16)	FVNQHLCGSHLVEALY	840840	DQ8					Prot-imm; polyIC-treat; spont	Pr-mouse	n/a	B-	29967002	Boitard C	1
	*25-41 (B1-17)	FVNQHLCGSHLVEALYL	103908	Class II				3H-thymidine			n/a	D+	11869047	Durinovic-Belló I	1
	*30-46 (B6-22)	LCGSHLVEALYLVCGER	104030	Class II				3H-thymidine; ELISA			n/a	D+	14745491	Durinovic-Belló I	1
	*30-46 (B6-22)	LCGSHLVEALYLVCGER	104030	DQ8				3H-thymidine; ELISA; T cell			n/a	C-	21562577	Roep BO	1
	*31-47 (B7-23)	CGSHLVEALYLVCGERG	933280	Class II			3H-thymidine				n/a	D+	12592644	Dayan CM	1
	*33-47 (B9-23)	SHLVEALYLVCGERG	58388	DQ8 transdimer		ELISA; T cell					n/a	C+	27920090	Nakayama M	1
	33-47 (B9-23)	SHLVEALYLVCGERG	58388	DQ8				ELISpot; CFSE			n/a	D+	25831495	Michels A, Kappler JW
	33-47 (B9-23)	SHLVEALYLVCGERG	58388	DQ8		ELISA; T cell					n/a	C+	27920090	Nakayama M
	33-47 (B9-23)	SHLVEALYLVCGERG	58388	DQ8					Prot-imm; polyIC-treat	Pr-mouse	n/a	B-	29967002	Boitard C
	*33-47 (B9-23)	SHLVEALYLVCGERG	58388	DQ8		ELISA; T cell		ELISpot; CFSE	Prot-imm; polyIC-treat	Pr-mouse	n/a	A+	25831495, 27920090, 29967002		3
	*34-49 (B10-25)	HLVEALYLVCGERGFF	102517	Class II				3H-thymidine; T cell			n/a	C-	10330297	Semana G	1
	*34-53 (B10-29)	HLVEALYLVCGERGFFYTPK	105241	DQ8					Pept-imm		n/a	D-	9438206	David CS	1
	*34-53 (B10-29)	HLVEALYLVCGERGFFYTPK	105241	DQ6					Pept-imm		n/a	D-	9438206	David CS	1
	*35-47 (B11-23)	LVEALYLVCGERG	104895	DQ8				3H-thymidine; T cell			n/a	C-	25267644	Kappler JW, Kwok WW	1
	*35-49 (B11-25)	LVEALYLVCGERGFF	104062	DQ8		ELISA; T cell					n/a	C+	27920090	Nakayama M	1
	*35-51 (B11-27)	LVEALYLVCGERGFFYT	103394	DR1601				3H-thymidine; ELISA; T cell			n/a	C-	9650096	Schloot NC	1
	35-51 (B11-27)	LVEALYLVCGERGFFYT	103394	Class II				3H-thymidine			n/a	D+	11869047	Durinovic-Belló I
	35-51 (B11-27)	LVEALYLVCGERGFFYT	103394	Class II				3H-thymidine; ELISA			n/a	D+	14745491	Durinovic-Belló I
	*35-51 (B11-27)	LVEALYLVCGERGFFYT	103394	Class II				3H-thymidine; ELISA			n/a	D+	11869047, 14745491		2
	*37-47 (B13-23)	EALYLVCGERG	104759	DQ8				ELISA			n/a	D+	29438107	Michels AW	1
	*38-54 (B14-30)	ALYLVCGERGFFYTPKT	933279	Class II			3H-thymidine				n/a	D+	12592644	Dayan CM	1
	*40-55 (B16-31)	YLVCGERGFFYTPKTR	840972	DQ8					Prot-imm; polyIC-treat; spont	Pr-mouse	n/a	B-	29967002	Boitard C	1
	*40-56 (B16-32)	YLVCGERGFFYTPKTRR	923983	Class II				3H-thymidine; ELISA			n/a	D+	14745491	Durinovic-Belló I	1
	*42-71 (B18-C15)	VCGERGFFYTPKTRREAEDLQVGQVELGGG	105563	Class II				3H-thymidine			n/a	D+	15056379	Narendran P	1
	44-60 (B20-C4)	GERGFFYTPKTRREAED	103917	Class II				3H-thymidine			n/a	D+	11869047	Durinovic-Belló I
	44-60 (B20-C4)	GERGFFYTPKTRREAED	103917	Class II				3H-thymidine; ELISA			n/a	D+	14745491	Durinovic-Belló I
	*44-60 (B20-C4)	GERGFFYTPKTRREAED	103917	Class II				3H-thymidine; ELISA			n/a	D+	11869047, 14745491		2
	*44-63 (B20-C7)	GERGFFYTPKTRREAEDLQV	105818	DQ8					Pept-imm		n/a	D-	9438206	David CS	1
	*44-63 (B20-C7)	GERGFFYTPKTRREAEDLQV	105818	DQ6					Pept-imm		n/a	D-	9438206	David CS	1
	*45-61 (B21-C5)	ERGFFYTPKTRREAEDL	933281	Class II			3H-thymidine				n/a	D+	12592644	Dayan CM	1
	*46-61 (B22-C5)	RGFFYTPKTRREAEDL	418483	DQ8					Prot-imm; polyIC-treat	Pr-mouse	n/a	B-	29967002	Boitard C	1
	*48-60 (B24-C4)	FFYTPKTRREAED	103168	DR0301				Mmr			n/a	D+	16263242	Oling V	1
	*48-60 (B24-C4)	FFYTPKTRREAED	103168	Class II				3H-thymidine			n/a	D+	11409713	Sarugeri E	1
	*49-64 (B25-C8)	FYTPKTRREAEDLQVG	102451	Class II				3H-thymidine; T cell			n/a	C-	10330297	Semana G	1
	*49-65 (B25-C9)	FYTPKTRREAEDLQVGQ	103191	Class II				3H-thymidine; ELISA			n/a	D+	14745491	Durinovic-Belló I	1
	*52-68 (B28-C12)	PKTRREAEDLQVGQVEL	933289	Class II			3H-thymidine				n/a	D+	12592644	Dayan CM	1
	*54-69 (B30-C13)	TRREAEDLQVGQVELG	538096	DQ2/DQ8			ELISpot	3H-thymidine; T cell			n/a	C-	24089515	Roep BO	1
	*54-69 (B30-C13)	TRREAEDLQVG(Q→E)VELG	910786	DQ2/DQ8			ELISpot	3H-thymidine; T cell			n/a	C-	24089515	Roep BO	1
	*54-69 (B30-C13)	TRREAEDL(Q→E)VG(Q→E)VELG	910787	DQ2/DQ8			ELISpot	3H-thymidine; T cell			n/a	C-	24089515	Roep BO	1
	54-70 (B30-C14)	TRREAEDLQVGQVELGG	104316	Class II				3H-thymidine			n/a	D+	11869047	Durinovic-Belló I
	54-70 (B30-C14)	TRREAEDLQVGQVELGG	104316	Class II				3H-thymidine; ELISA			n/a	D+	14745491	Durinovic-Belló I
	*54-70 (B30-C14)	TRREAEDLQVGQVELGG	104316	Class II				3H-thymidine; ELISA			n/a	D+	11869047, 14745491		2
	*55-70 (B31-C14)	RREAEDLQVGQVELGG	840928	DQ8					Prot-imm; polyIC-treat; spont	Pr-mouse	n/a	B-	29967002	Boitard C	1
	*57-87 (C1-31)	EAEDLQVGQVELGGGPGAGSLQPLALEGSLQ	104452	Class II				CFSE			n/a	D+	30275329	Mannering SI	1
	*57-70 (C1-14)	EAEDLQVGQVELGG	857864	DQ8				ELISA; CFSE			n/a	D+	30275329	Mannering SI	1
	*58-67 (C2-11)	AEDLQVGQVE	174367	DQ8				ELISA; CFSE			n/a	D+	30275329	Mannering SI	1
	*59-74 (C3-18)	EDLQVGQVELGGGPGA	102379	Class II				3H-thymidine; T cell			n/a	C-	10330297	Semana G	1
	59-75 (C3-19)	EDLQVGQVELGGGPGAG	103869	Class II			3H-thymidine				n/a	D+	12592644	Dayan CM
	59-75 (C3-19)	EDLQVGQVELGGGPGAG	103869	Class II				3H-thymidine; ELISA			n/a	D+	14745491	Durinovic-Belló I
	*59-75 (C3-19)	EDLQVGQVELGGGPGAG	103869	Class II			3H-thymidine	3H-thymidine; ELISA			n/a	D+	12592644, 14745491		2
	*61-76 (C5-20)	LQVGQVELGGGPGAGS	840894	DQ8					Prot-imm; polyIC-treat	Pr-mouse	n/a	B-	29967002	Boitard C	1
	*64-76 (C8-20)	GQVELGGGPGAGS	952145	DQ8			CFSE				no	D+	25157096	Mannering SI	1
	64-80 (C8-24)	GQVELGGGPGAGSLQPL	103948	Class II				3H-thymidine			n/a	D+	11869047	Durinovic-Belló I
	64-80 (C8-24)	GQVELGGGPGAGSLQPL	103948	Class II				3H-thymidine; ELISA			n/a	D+	14745491	Durinovic-Belló I
	*64-80 (C8-24)	GQVELGGGPGAGSLQPL	103948	Class II				3H-thymidine; ELISA			n/a	D+	11869047, 14745491		2
	*64-83 (C8-27)	GQVELGGGPGAGSLQPLALE	105845	DQ6					Pept-imm		n/a	D-	9438206	David CS	1
	65-73 (C9-17)	QVELGGGPG	174710	DQ8		IFNγ ELISA; T cell					n/a	C+	25157096	Mannering SI
	65-73 (C9-17)	QVELGGGPG	174710	DQ8		ELISA; CFSE; T cell					n/a	C+	30275329	Mannering SI
	*65-73 (C9-17)	QVELGGGPG	174710	DQ8		ELISA; CFSE; T cell					n/a	C+	25157096, 30275329		2
	65-75 (C9-19)	QVELGGGPGAG	858014	DQ8		IFNγ ELISA; T cell					n/a	C+	25157096	Mannering SI
	65-75 (C9-19)	QVELGGGPGAG	858014	DQ8		ELISA; CFSE; T cell					n/a	C+	30275329	Mannering SI
	*65-75 (C9-19)	QVELGGGPGAG	858014	DQ8		ELISA; CFSE; T cell					n/a	C+	25157096, 30275329		2
	*66-73 (C10-17)	VELGGGPG	858095	DQ8		ELISA; CFSE; T cell					n/a	C+	30275329	Mannering SI	1
	66-74 (C10-18)	VELGGGPGA	174788	DQ8		IFNγ ELISA; T cell					n/a	C+	25157096	Mannering SI
	66-74 (C10-18)	VELGGGPGA	174788	DQ8		ELISA; CFSE; T cell					n/a	C+	30275329	Mannering SI
	*66-74 (C10-18)	VELGGGPGA	174788	DQ8		ELISA; CFSE; T cell					n/a	C+	25157096, 30275329		2
	*66-82 (C10-26)	VELGGGPGAGSLQPLAL	933294	Class II			3H-thymidine				n/a	D+	12592644	Dayan CM	1
	*69-85 (C13-29)	GGGPGAGSLQPLALEGS	103922	Class II				3H-thymidine; ELISA			n/a	D+	14745491	Durinovic-Belló I	1
	*69-88 (C13-32)	GGGPGAGSLQPLALEGSLQK	134060	DR0401					Prot-imm	Pr-mouse	n/a	B-	26206289	Peakman M	1
	*69-88 (C13-32)	GGGPGAGSLQPLALEGSLQK	134060	Class II			ELISpot				n/a	D+	20369219	Dayan CM	1
	*69-88 (C13-32)	GGGPGAGSLQPLALEGSLQK	134060	DR4			ELISpot			MS	n/a	B+	14755342	Peakman M	1
	*70-86 (C14-30)	GGPGAGSLQPLALEGSL	103215	DQ8					Prot-imm; polyIC-treat; spont	Pr-mouse	n/a	B-	29967002	Boitard C	1
	*72-83 (C16-27)	PGAGSLQPLALE	857990	DQ8				ELISA; CFSE			n/a	D+	30275329	Mannering SI	1
	*72-86 (C16-30)	PGAGSLQPLALEGSL	913900	DQ8/DQ8 transdimer			CFSE				no	D+	25157096	Mannering SI	1
	*73-82 (C17-26)	GAGSLQPLAL	174496	DQ8 transdimer				ELISA; CFSE			n/a	D+	30275329	Mannering SI	1
	*73-89 (C17-33)	GAGSLQPLALEGSLQKR	604401	Class II			3H-thymidine				n/a	D+	12592644	Dayan CM	1
	*73-89 (C17-33)	GAGSLQPLALEGSLQKR	604401	DQ8 transdimer		ELISA; T cell					n/a	C+	27920090	Nakayama M	1
	73-90 (C17-A1)	GAGSLQPLALEGSLQKRG	102454	DR0401					Prot-imm	Pr-mouse	n/a	B-	9520453	Sønderstrup G
	73-90 (C17-A1)	GAGSLQPLALEGSLQKRG	102454	DR0401				Biological activity			n/a	D+	19120311	Durinovic-Belló I
	*73-90 (C17-A1)	GAGSLQPLALEGSLQKRG	102454	DR0401				Biological activity	Prot-imm	Pr-mouse	n/a	B+	9520453, 19120311		2
	*73-92 (C17-A3)	GAGSLQPLALEGSLQKRGIV	138770	DR0401				Cytokine array			n/a	D+	20634998	Kwok WW	1
	74-82 (C18-26)	AGSLQPLAL	174376	DQ8		IFNγ ELISA; T cell					n/a	C+	25157096	Mannering SI
	74-82 (C18-26)	AGSLQPLAL	174376	DQ8		ELISA; CFSE; T cell					n/a	C+	30275329	Mannering SI
	*74-82 (C18-26)	AGSLQPLAL	174376	DQ8		ELISA; CFSE; T cell					n/a	C+	25157096, 30275329		2
	74-83 (C18-27)	AGSLQPLALE	174377	DQ8		IFNγ ELISA; T cell					n/a	C+	25157096	Mannering SI
	74-83 (C18-27)	AGSLQPLALE	174377	DQ8		ELISA; CFSE; T cell					n/a	C+	30275329	Mannering SI
	*74-83 (C18-27)	AGSLQPLALE	174377	DQ8		ELISA; CFSE; T cell					n/a	C+	25157096, 30275329		2
	74-90 (C18-A1)	AGSLQPLALEGSLQKRG	103791	Class II				3H-thymidine			n/a	D+	11869047	Durinovic-Belló I
	74-90 (C18-A1)	AGSLQPLALEGSLQKRG	103791	Class II				3H-thymidine; ELISA			n/a	D+	14745491	Durinovic-Belló I
	*74-90 (C18-A1)	AGSLQPLALEGSLQKRG	103791	Class II				3H-thymidine; ELISA			n/a	D+	11869047, 14745491		2
	*74-90 (C18-A1)	AGSLQPLALEGSLQKRG	103791	DR0401				ELISA; ICS			n/a	D+	20110445	Burster T	1
	*74-93 (C18-A4)	AGSLQPLALEGSLQKRGIVE	105666	DQ8					Pept-imm		n/a	D-	9438206	David CS	1
	*74-93 (C18-A4)	AGSLQPLALEGSLQKRGIVE	105666	DQ6					Pept-imm		n/a	D-	9438206	David CS	1
	75-92 (C19-A3)	GSLQPLALEGSLQKRGIV	104511	DR0401			ELISpot				n/a	D+	19040615	Dayan CM
	75-92 (C19-A3)	GSLQPLALEGSLQKRGIV	104511	DR0401					Prot-imm	Pr-mouse	n/a	B-	26206289	Peakman M
	75-92 (C19-A3)	GSLQPLALEGSLQKRGIV	104511	DR0401			ELISpot				n/a	D+	28794283	Peakman M
	*75-92 (C19-A3)	GSLQPLALEGSLQKRGIV	104511	DR0401			ELISpot		Prot-imm	Pr-mouse	n/a	B+	19040615, 26206289, 28794283		3
	75-92 (C19-A3)	GSLQPLALEGSLQKRGIV	104511	DR4			ELISpot			MS	n/a	B+	14755342	Peakman M
	75-92 (C19-A3)	GSLQPLALEGSLQKRGIV	104511	DR4				ELISpot			n/a	D+	24239002	Delong T
	*75-92 (C19-A3)	GSLQPLALEGSLQKRGIV	104511	DR4			ELISpot	ELISpot		MS	n/a	B+	14755342, 24239002		2
	*76-85 (C20-29)	SLQPLALEGS	174743	DQ8 transdimer		CFSE; T cell		CFSE; ELISA			n/a	C+	30275329	Mannering SI	1
	76-86 (C20-30)	SLQPLALEGSL	858046	DQ8 transdimer		IFNγ ELISA; T cell					n/a	C+	25157096	Mannering SI
	76-86 (C20-30)	SLQPLALEGSL	858046	DQ8 transdimer		CFSE; T cell					n/a	C+	30275329	Mannering SI
	*76-86 (C20-30)	SLQPLALEGSL	858046	DQ8 transdimer		ELISA; CFSE; T cell					n/a	C+	25157096, 30275329		2
	*76-86 (C20-30)	SLQPLALEGSL	858046	DR0401				ELISA; CFSE			n/a	D+	30275329	Mannering SI	1
	*76-87 (C20-31)	SLQPLALEGSLQ	858047	DQ2 transdimer				CFSE; ELISA			n/a	D+	30275329	Mannering SI	1
	76-90 (C20-A1)	SLQPLALEGSLQKRG	101243	DR0401				3H-thymidine			n/a	D+	18385016	Kwok WW
	76-90 (C20-A1)	SLQPLALEGSLQKRG	101243	DR0401				Mmr; T cell			n/a	C-	22069252	Durinovic-Belló I
	76-90 (C20-A1)	SLQPLALEGSLQKRG	101243	DR0401				Mmr			n/a	D+	24844227	Durinovic-Belló I, Nepom GT
	76-90 (C20-A1)	SLQPLALEGSLQKRG	101243	DR0401		IFNγ ELISA; CBA; T cell					n/a	C+	27798614	Kent SC
	76-90 (C20-A1)	SLQPLALEGSLQKRG	101243	DR0401				Mmr			n/a	D+	30428974	James EA
	*76-90 (C20-A1)	SLQPLALEGSLQKRG	101243	DR0401		IFNγ ELISA; CBA; T cell		3H-thymidine; Mmr; T cell			n/a	C+	18385016, 22069252, 24844227, 27798614, 30428974		5
	*78-94 (C22-A5)	QPLALEGSLQKRGIVEQ	462422	DR0401					Prot-imm	Pr-mouse	n/a	B-	26206289	Peakman M	1
	*78-94 (C22-A5)	QPLALEGSLQKRGIVEQ	462422	DR4			ELISpot			MS	n/a	B+	14755342	Peakman M	1
	*78-86 (C22-30)	QPLALEGSL	174706	DQ2				CFSE; ELISA			n/a	D+	30275329	Mannering SI	1
	*78-87 (C22-31)	QPLALEGSLQ	174707	DR0401				CFSE; ELISA			n/a	D+	30275329	Mannering SI	1
	*79-95 (C23-A6)	PLALEGSLQKRGIVEQC	104177	Class II				3H-thymidine; ELISA			n/a	D+	14745491	Durinovic-Belló I	1
	*80-86 (C24-30)	LALEGSL	857935	DQ2				ELISA; CFSE			n/a	D+	30275329	Mannering SI	1
	*80-86 (C24-30)	LALEGSL	857935	DQ2 transdimer				ELISA			n/a	D+	30275329	Mannering SI	1
	*80-86 (C24-30)	LALEGSL	857935	DQ8				CFSE			n/a	D+	30275329	Mannering SI	1
	*80-88 (C24-32)	LALEGSLQK	103335	DR0401				Bioassay; ELISA			n/a	D+	16868084	McDevitt HO	1
	*80-96 (C24-A7)	LALEGSLQKRGIVEQCC	933284	Class II			3H-thymidine				n/a	D+	12592644	Dayan CM	1
	*80-97 (C24-A8)	LALEGSLQKRGIVEQCCT	840879	DQ8					Prot-imm; polyIC-treat; spont	Pr-mouse	n/a	B-	29967002	Boitard C	1
	84-100 (C28-A11)	GSLQKRGIVEQCCTSIC	103953	Class II				3H-thymidine			n/a	D+	11869047	Durinovic-Belló I
	84-100 (C28-A11)	GSLQKRGIVEQCCTSIC	103953	Class II				3H-thymidine; ELISA			n/a	D+	14745491	Durinovic-Belló I
	*84-100 (C28-A11)	GSLQKRGIVEQCCTSIC	103953	Class II				3H-thymidine; ELISA			n/a	D+	11869047, 14745491		2
	*85-101 (C29-A12)	SLQKRGIVEQCCTSICS	104628	DR0401					Prot-imm	Pr-mouse	n/a	B-	9520453	Sønderstrup G	1
	*87-103 (C31-A14)	QKRGIVEQCCTSICSLY	933290	Class II			3H-thymidine				n/a	D+	12592644	Dayan CM	1
	*88-102 (C32-A13)	KRGIVEQCCTSICSL	103321	DR4				3H-thymidine; T cell			n/a	C-	19292763	Mannering SI	1
	*90-101 (A1-12)	GIVEQCCTSICS	104808	DR				3H-thymidine			n/a	D+	18565729	Ilonen J	1
	*90-101 (A1-12)	GIVEQCCTSICS	104808	DQ				3H-thymidine			n/a	D+	18565729	Ilonen J	1
	*90-102 (A1-13)	GIVEQCCTSICSL (vicinal disulfide C95-C96)	910744	DR				3H-thymidine; T cell			n/a	C-	16260488	Mannering SI, Purcell AW	1
	*90-104 (A1-15)	GIVEQCCTSICSLYQ	103926	DR0401		ELISA; 3H-thymidine; T cell					n/a	C+	15889096	Hafler DA	1
	*90-105 (A1-16)	GIVEQCCTSICSLYQL	923350	Class II				3H-thymidine; ELISA			n/a	D+	14745491	Durinovic-Belló I	1
	*92-104 (A3-15)	VEQCCTSICSLYQ	102889	Class II				3H-thymidine			n/a	D+	10330297	Semana G	1
	*92-110 (A3-21)	VEQCCTSICSLYQLENYCN	840960	DQ8					Prot-imm; polyIC-treat; spont	Pr-mouse	n/a	B-	29967002	Boitard C	1
	*94-105 (A5-16)	QCCTSICSLYQL	104945	Class II				3H-thymidine			n/a	D+	18565729	Ilonen J	1
	*94-110 (A5-21)	QCCTSICSLYQLENYCN	106028	Class II			3H-thymidine				n/a	D+	12592644	Dayan CM	1
	*94-110 (A5-21)	QCCTSICSLYQLENYCN	106028	DQ8					Pept-imm		n/a	D-	9438206	David CS	1
	*94-110 (A5-21)	QCCTSICSLYQLENYCN	106028	DQ6					Pept-imm		n/a	D-	9438206	David CS	1
	95-110 (A6-21)	CCTSICSLYQLENYCN	103824	Class II				3H-thymidine			n/a	D+	11869047	Durinovic-Belló I
	95-110 (A6-21)	CCTSICSLYQLENYCN	103824	Class II				3H-thymidine; ELISA			n/a	D+	14745491	Durinovic-Belló I
	*95-110 (A6-21)	CCTSICSLYQLENYCN	103824	Class II				3H-thymidine; ELISA			n/a	D+	11869047, 14745491		2
	*98-110 (A9-21)	SICSLYQLENYCN	104979	Class II				3H-thymidine			n/a	D+	18565729	Ilonen J	1
S100b	*6-25	KAMVALIDVFHQYSGREGDK	422018	DR0401			IFNγ ELISpot			MS	yes	B+	25516468	Varela-Calvino R	1
(S100B)	*21-36	REGDKHKLKKSELKEL	422069	DR0401			IFNγ ELISpot			MS	yes	B+	25516468	Varela-Calvino R	1
	*25-46	KHKLKKSELKELINNELSHFLE	422020	DR0401			IFNγ ELISpot			MS	yes	B+	25516468	Varela-Calvino R	1
	*68-92	ECDFQEFMAFVAMVTTACHEFFEHE	421964	DR0401			IFNγ ELISpot			MS	yes	B+	25516468	Varela-Calvino R	1
ZnT8	*1-27	MEFLERTYLVNDKAAKM(Y→H)AFTLESVEL	174655	DR4			IFNγ ELISpot				n/a	D+	21471440	Davidson HW	1
(SLC30A8)	*5-19	ERTYLVNDKAAKM(Y→H)A	186664	Class II			CFSE	Cytokine array; ICS			n/a	D+	23390544	Ueno H	1
	*15-41	AKM(Y→H)AFTLESVELQQKPVNKDQCPRER	174379	DR4			IFNγ ELISpot				n/a	D+	21471440	Davidson HW	1
	*64-90	ANEYAYAKWKLCSASAICFIFMIAEVV	174388	DR4			IFNγ ELISpot				n/a	D+	21471440	Davidson HW	1
	*67-80	YAYAKWKLCSASAI	186722	Class II			CFSE	Cytokine array; ICS			n/a	D+	23390544	Ueno H	1
	*78-104	SAICFIFMIAEVVGGHIAGSLAVVTDA	174730	DR4			IFNγ ELISpot				n/a	D+	21471440	Davidson HW	1
	*106-132	HLLIDLTSFLLSLFSLWLSSKPPSKRL	174539	DR4			IFNγ ELISpot				n/a	D+	21471440	Davidson HW	1
	*120-146	SLWLSSKPPSKRLTFGWHRAEILGALL	174745	DR3			IFNγ ELISpot				n/a	D+	21471440	Davidson HW	1
	*120-146	SLWLSSKPPSKRLTFGWHRAEILGALL	174745	DR4			IFNγ ELISpot				n/a	D+	21471440	Davidson HW	1
	*124-138	SSKPPSKRLTFGWHR	186707	Class II			CFSE	Cytokine array			n/a	D+	23390544	Ueno H	1
	*134-174	FGWHRAEILGALLSILCIWVVTGVLVYLACERLLYPDYQIQ	174484	DR3			IFNγ ELISpot				n/a	D+	21471440	Davidson HW	1
	*134-174	FGWHRAEILGALLSILCIWVVTGVLVYLACERLLYPDYQIQ	174484	DR4			IFNγ ELISpot				n/a	D+	21471440	Davidson HW	1
	*162-188	ACERLLYPDYQIQATVMIIVSSCAVAA	174364	DR4			IFNγ ELISpot				n/a	D+	21471440	Davidson HW	1
	*197-223	HQRCLGHNHKEVQANASVRAAFVHALG	174542	DR4			IFNγ ELISpot				n/a	D+	21471440	Davidson HW	1
	*211-237	NASVRAAFVHALGDLFQSISVLISALI	174667	DR4			IFNγ ELISpot				n/a	D+	21471440	Davidson HW	1
	*244-258	YKIADPICTFIFSIL	186725	Class II			CFSE	Cytokine array; ICS			n/a	D+	23390544	Ueno H	1
	*253-279	FIFSILVLASTITILKDFSILLMEGVP	174486	DR4			IFNγ ELISpot				n/a	D+	21471440	Davidson HW	1
	*254-268	IFSILVLASTITILK	186680	Class II			CFSE	Cytokine array			n/a	D+	23390544	Ueno H	1
	*266-285	ILKDFSILLMEGVPKSLNYS	644825	DR				CD69/CD154 upreg; T cell			n/a	C-	28550202	Kwok WW	1
	*267-293	LKDFSILLMEGVPKSLNYSGVKELILA	174637	DR4			IFNγ ELISpot				n/a	D+	21471440	Davidson HW	1
	*271-283	SILLMEGVPKSLN	138810	DR0401				Cytokine array			n/a	D+	20634998	Kwok WW	1
	*295-321	DGVLSVHSLHIWSLTMNQVILSAHVAT	174440	DR4			IFNγ ELISpot				n/a	D+	21471440	Davidson HW	1
	*309-335	TMNQVILSAHVATAASRDSQVVRREIA	174759	DR4			IFNγ ELISpot				n/a	D+	21471440	Davidson HW	1
	*323-356	ASRDSQVVRREIAKALSKSFTMHSLTIQMESPVD	174399	DR3			IFNγ ELISpot				n/a	D+	21471440	Davidson HW	1
	*323-356	ASRDSQVVRREIAKALSKSFTMHSLTIQMESPVD	174399	DR4			IFNγ ELISpot				n/a	D+	21471440	Davidson HW	1
	*326-340	DSQVVRREIAKALSK	186661	Class II			CFSE	Cytokine array			n/a	D+	23390544	Ueno H	1
	*330-349	VRREIAKALSKSFTMHSLTI	651976	DR				CD69/CD154 upreg; T cell			n/a	C-	28550202	Kwok WW	1
	*352-366	ESPVDQDPDCLFCED	186665	Class II			CFSE	Cytokine array			n/a	D+	23390544	Ueno H	1
Non-conventional epitopes (excluding post-translational modifications, which are included above)
Epitope	Epitope	Sequence	IEDB #1	MHC	Human islets, pLNs		Human blood, spleen		HLA-tg mouse4	NPP5	Ex vivo type 1	Evidence	Refs7	Corresponding Author	Reporting
type	source8				Ex vivo2	Other3	Ex vivo2	Other3			diabetes > controls				Articles
INS hybrid	*C-pep:InsA	GQVELGGGGIVEQCC	583306	Class II		IFNγ ELISA; T cell					n/a	C+	27798614	Kent SC	1
INS hybrid	C-pep:IAPP2	GQVELGGGNAVEVLK	505706	DQ8 (DR4?)		IFNγ ELISA; T cell					n/a	C+	26912858	Delong T, Haskins K
INS hybrid	C-pep:IAPP2	GQVELGGGNAVEVLK	505706	DQ8 (DR4?)		IFNγ ELISA; CBA; T cell					n/a	C+	27798614	Kent SC
INS hybrid	*C-pep:IAPP2	GQVELGGGNAVEVLK	505706	DQ8 (DR4?)		IFNγ ELISA; CBA; T cell					n/a	C+	26912858, 27798614		2
INS hybrid	C-pep:NP-Y	GQVELGGGSSPETLI	505707	DQ8		IFNγ ELISA; T cell					n/a	C+	26912858	Delong T, Haskins K
INS hybrid	C-pep:NP-Y	GQVELGGGSSPETLI	505707	DQ8		IFNγ ELISA; CBA; T cell					n/a	C+	27798614	Kent SC
INS hybrid	*C-pep:NP-Y	GQVELGGGSSPETLI	505707	DQ8		IFNγ ELISA; CBA; T cell					n/a	C+	26912858, 27798614		2
INS hybrid	*C-pep:IAPP1	GQVELGGGTPIESHQ	583307	(DR4?)		IFNγ ELISA; CBA; T cell					n/a	C+	27798614	Kent SC	1
In cases where an epitope is reported in more than one paper, the entries are in gray font and are followed by a summary line in bold with the epitope position preceded by an asterisk.
Epitopes reported in one paper only are also in bold with the epitope position preceded by an asterisk.
1 Immune Epitope Data Base number, www.iedb.org
2 The type of assay performed is indicated, e.g., cytokine bead array (CBA), HLA multimer (Mmr), intracellular cytokine staining (ICS), marker upregulation (upreg), proliferation (prolif).
3 T cell clone or line (T cell).
4 Epitope-reactive T cells observed spontaneously (spont) or in peptide-immunized (pept-imm), protein-immunized (prot-imm), or polyIC-treated (polyIC-treat) HLA-Tg mice. The generation of T cell hybridomas (hybr) is also noted.
5 NPP, natural processing/presentation: peptide elution and identification by mass spectrometry (MS); response to antigen protein (prot in vitro); response to antigen-expressing cells (APC); protein immunization response in HLA-Tg mice (pr-mouse).
6 Yes, the indicated ex vivo frequency difference between type 1 diabetes patients and controls is statistically supported; no, patients are not statistically greater than controls; n/a, no statistics are provided or only one group
was examined or ex vivo human data are not reported; yes/no reflects multiple studies with different findings.
7 PubMed identifier (PMID) for each reference is indicated.
8 IAPP1 and IAPP2 are non-overlapping regions of IAPP. NP-Y, neuropeptide Y.
